# Supplementary material for: Finding enzyme cofactors in Protein Data Bank
Source: Oxford University Press journal article supplement (doi:10.1093/bioinformatics/btz115), 2019-02-13

## Supplementary Information

### Tables

**Table 1: Details of the 27 cofactor classes in the CoFactor database and the template molecule identified for each cofactor class**

| Cofactor class | Cofactor type               | Reference chemical component ID from PDB chemical component dictionary | Chemical structure                                                                   | Smiles code                                                                              |
|----------------|-----------------------------|------------------------------------------------------------------------|--------------------------------------------------------------------------------------|------------------------------------------------------------------------------------------|
| 1              | Thiamine diphosphate        | TDP                                                                    | 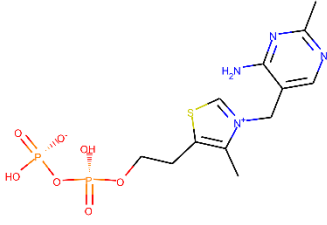   | <chem>Cc1c(sc[n+]1Cc2cnc(nc2N)C)CCOP(=O)(O)OP(=O)(O)O</chem>                             |
| 2              | Flavin adenine dinucleotide | FAD                                                                    |   | <chem>[P@](=O)(O)OC[C@H]4[C@H]([C@H]([C@@H](O4)n5cnc6c5ncnc6N)O)O)O)O</chem>             |
| 3              | Flavin Mononucleotide       | FMN                                                                    |  | <chem>Cc1cc2c(cc1C)N(C3=NC(=O)NC(=O)C3=N2)C[C@@H]([C@@H]([C@@H](COP(=O)(O)O)O)O)O</chem> |

|   |                                   |     |                                                                                      |                                                                                                                                                 |
|---|-----------------------------------|-----|--------------------------------------------------------------------------------------|-------------------------------------------------------------------------------------------------------------------------------------------------|
| 4 | Nicotinamide-adenine dinucleotide | NAD | 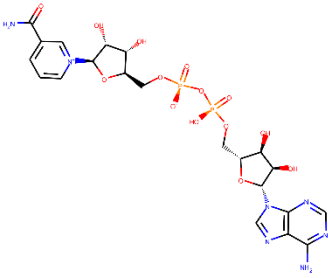   | <chem>c1cc(c[n+](c1)[C@H]2[C@@H]([C@@H]([C@H](O2)CO[P@@](=O)([O-])O[P@@](=O)(O)OC[C@H]3[C@H]([C@H]([C@@H](O3)n4cnc5c4ncnc5N)O)O)O)C(=O)N</chem> |
| 5 | Phosphopantetheine                | PNS |    | <chem>CC(C)(COP(=O)(O)O)[C@H](C(=O)NCCC(=O)NCCS)O</chem>                                                                                        |
| 6 | Coenzyme A                        | COA |   | <chem>CC(C)(CO[P@](=O)(O)O[P@@](=O)(O)OC[C@H]1[C@H]([C@H]([C@@H](O1)n2cnc3c2ncnc3N)O)OP(=O)(O)O)[C@H](C(=O)NCCC(=O)NCCS)O</chem>                |
| 7 | Pyridoxal 5'-phosphate            | PLP |  | <chem>Cc1c(c(c(cn1)COP(=O)(O)O)C=O)O</chem>                                                                                                     |
| 8 | Glutathione                       | GSH |  | <chem>c1cc(ccc1CSC[C@@H](C(=O)NCC(=O)O)NC(=O)CC[C@@H](C(=O)O)[NH3+])</chem>                                                                     |

|    |                      |     |                                                                                      |                                                                                                                                                                                                                |
|----|----------------------|-----|--------------------------------------------------------------------------------------|----------------------------------------------------------------------------------------------------------------------------------------------------------------------------------------------------------------|
|    |                      |     |                                                                                      |                                                                                                                                                                                                                |
| 9  | Biotin               | BTN | 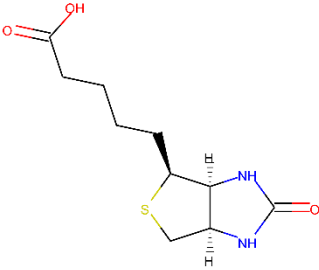   | <chem>C1[C@H]2[C@@H]([C@@H](S1)CCCC(=O)O)NC(=O)N2</chem>                                                                                                                                                       |
| 10 | Tetrahydrofolic acid | FFO |    | <chem>O=C(O)CC[C@@H](C(=O)O)NC(=O)c1ccc(cc1)NC[C@H](N2)CNC(c23)nc(N)[nH]c3=O</chem>                                                                                                                            |
| 11 | Adenosylcobalamin    | B12 |  | <chem>Cc1cc2c(cc1C)n(cn2)C3C(C(C(O3)CO)OP(=O)(O)OC(C)CNC(=O)CC4(C(C5C6(C(C(C7=[N]6[Co+2]89[N]5=C4C(=C1[NH]8C(=CC2=[N]9C(=C7C)C(C2CCC(=O)N)(C)CC(=O)N)C(C1CCC(=O)N)(C)C)CC(=O)N)(C)CC(=O)N)C)CC(=O)N)C)O</chem> |
| 12 | Ascorbic acid        | ASC |  | <chem>C([C@@H]([C@@H]1C(=C(C(=O)O1)O)O)O)O</chem>                                                                                                                                                              |

|    |                                    |     |                                                                                      |                                                                                                                                                       |
|----|------------------------------------|-----|--------------------------------------------------------------------------------------|-------------------------------------------------------------------------------------------------------------------------------------------------------|
| 13 | Menaquinone                        | MQ7 | 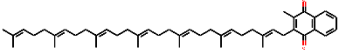   | <chem>CC(C)=CCC/C(C)=C/CC/C(C)=C/CC/C(C)=C/CC/C(C)=C/CC/C(C)=C/CC/C(C)=C/CC(C1=O)=C(C)C(=O)c12)cccc2</chem>                                           |
| 14 | Ubiquinone                         | UQ1 |    | <chem>CC1=C(C(=O)C(=C(C1=O)OC)OC)CC=C(C)C</chem>                                                                                                      |
| 15 | Molybdopterin                      | MGD |   | <chem>c1nc2c(n1[C@H]3[C@@H]([C@@H]([C@H](O3)CO[P@@](=O)(O)O[P@@](=O)(O)OC[C@H]4C(=C([C@H]5[C@@H](O4)NC6=C(N5)C(=O)NC(=N6)N)S)S)O)O)N=C(NC2=O)N</chem> |
| 16 | Bioterin                           | H4B |  | <chem>C[C@@H]([C@@H]([C@H]1CNC2=C(N1)C(=O)NC(=N2)N)O)O</chem>                                                                                         |
| 17 | MIO (4-methylideneimidazole-5-one) | MDO |  | <chem>C[C@@H]([C1=NC(=C)C(=O)N1C(=O)O)N</chem>                                                                                                        |

|    |                      |     |                                                                                      |                                                                                                                                                                                       |
|----|----------------------|-----|--------------------------------------------------------------------------------------|---------------------------------------------------------------------------------------------------------------------------------------------------------------------------------------|
| 18 | S-adenosylmethionine | SAM | 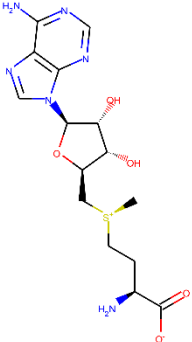   | <chem>C[S@@+](CC[C@@H](C(=O)[O-])N)C[C@@H]1[C@H]([C@H]([C@@H](O1)n2cnc3c2ncnc3N)O)O</chem>                                                                                            |
| 19 | Factor F430          | F43 |    | <chem>NC(=O)C[C@@]1(C)[C@H](CCC(=O)O)[C@H](C2)[N+]3=C1Cc4c(CC(=O)O)c(c5n4[Ni]36N7C8[C@@H](CCC(=O)O)[C@]([C@@]279)(C)CC(=O)N9)CCC(=O)C5=C1N6C(=C8)[C@@H](CC(=O)O)[C@H]1CCC(=O)O</chem> |
| 20 | Coenzyme M           | COM |  | <chem>SCCS(=O)(=O)O</chem>                                                                                                                                                            |
| 21 | Coenzyme B           | TP7 |  | <chem>O=P(O)(O)O[C@H](C)[C@@H](C(=O)O)NC(=O)CCCCCS</chem>                                                                                                                             |
| 22 | Heme                 | HEA |  | <chem>CC(C)=CCC/C(C)=C/CC/C(C)=C/CC[C@H](O)C1=C(C)C(=[N+]2C1=Cc3c(C)c(C=C)c4n3[Fe]256)C=c7n5c(c(c7C=O)CCC(=O)O)=CC8=[N+]6C(=C4)C(C)=C8CCC(=O)O</chem>                                 |

|    |                          |     |                                                                                      |                                                                            |
|----|--------------------------|-----|--------------------------------------------------------------------------------------|----------------------------------------------------------------------------|
| 24 | Dipyrromethane           | DPM | 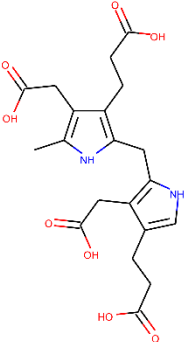   | <chem>O=C(O)CCC(=C1CC(=O)O)[C@@H](N=C1C)CC2=NCC(CCC(=O)O)=C2CC(=O)O</chem> |
| 25 | Pyrroloquinoline Quinone | PQQ |    | <chem>O=C(O)c(c1)[nH]c(c12)c3c(C(=O)O)C2=O)nc(C(=O)O)cc3C(=O)O</chem>      |
| 26 | Topaquinone              | TPQ |   | <chem>C1=C(C(=O)C=C(C1=O)O)C[C@@H](C(=O)O)N</chem>                         |
| 27 | Orthoquinone             | TRQ |  | <chem>O=C(O)[C@@H](N)Cc(c[nH]1)c(c12)C=CC(=O)C2=O</chem>                   |
| 28 | Lipoic acid              | LPA |  | <chem>C1CSS[C@@H]1CCCCC(=O)O</chem>                                        |

Table 2. The complete set of EC numbers identified using information from CoFactor and BRENDA databases for each cofactor class

| <b>Cofactor class ID</b> | <b>Representative chemical component id from PDB for each Cofactor class</b> | <b>EC numbers for each Cofactor class from the CoFactor Database</b> | <b>Additional EC numbers identified for each cofactor class from the BRENDA Database</b> | <b>EC numbers identified for a Cofactor class</b> |
|--------------------------|------------------------------------------------------------------------------|----------------------------------------------------------------------|------------------------------------------------------------------------------------------|---------------------------------------------------|
| <b>1</b>                 | <b>TDP</b>                                                                   | <b>30</b>                                                            | <b>19</b>                                                                                | <b>49</b>                                         |
| <b>2</b>                 | <b>FAD</b>                                                                   | <b>235</b>                                                           | <b>316</b>                                                                               | <b>551</b>                                        |
| <b>3</b>                 | <b>FMN</b>                                                                   | <b>43</b>                                                            | <b>154</b>                                                                               | <b>197</b>                                        |
| <b>4</b>                 | <b>NAD</b>                                                                   | <b>745</b>                                                           | <b>365</b>                                                                               | <b>1110</b>                                       |
| <b>5</b>                 | <b>PNS</b>                                                                   | <b>8</b>                                                             | <b>5</b>                                                                                 | <b>13</b>                                         |
| <b>6</b>                 | <b>COA</b>                                                                   | <b>237</b>                                                           | <b>17</b>                                                                                | <b>254</b>                                        |
| <b>7</b>                 | <b>PLP</b>                                                                   | <b>138</b>                                                           | <b>87</b>                                                                                | <b>225</b>                                        |
| <b>8</b>                 | <b>GSH</b>                                                                   | <b>35</b>                                                            | <b>10</b>                                                                                | <b>45</b>                                         |
| <b>9</b>                 | <b>BTN</b>                                                                   | <b>11</b>                                                            | <b>4</b>                                                                                 | <b>15</b>                                         |
| <b>10</b>                | <b>FFO</b>                                                                   | <b>6</b>                                                             | <b>22</b>                                                                                | <b>28</b>                                         |
| <b>11</b>                | <b>B12</b>                                                                   | <b>15</b>                                                            | <b>33</b>                                                                                | <b>48</b>                                         |
| <b>12</b>                | <b>ASC</b>                                                                   | <b>20</b>                                                            | <b>16</b>                                                                                | <b>36</b>                                         |



|                    |     |             |             |             |
|--------------------|-----|-------------|-------------|-------------|
| 13                 | MQ7 | 1           | 10          | 11          |
| 14                 | UQ1 | 7           | 16          | 23          |
| 15                 | MGD | 14          | 27          | 41          |
| 16                 | H4B | 6           | 4           | 10          |
| 17                 | MDO | 4           |             | 4           |
| 18                 | SAM | 170         | 105         | 275         |
| 19                 | F43 | 1           |             | 1           |
| 20                 | COM | 1           | 1           | 2           |
| 21                 | TP7 | 1           |             | 1           |
| 22                 | HEA | 127         | 217         | 344         |
| 24                 | DPM |             | 1           | 1           |
| 25                 | PQQ | 9           |             | 9           |
| 26                 | TPQ |             | 3           | 3           |
| 27                 | TRQ | 1           |             | 1           |
| 28                 | LPA | 6           | 2           | 8           |
| <b>Grand Total</b> |     | <b>1871</b> | <b>1434</b> | <b>3305</b> |

Table 3: Cofactor class description, match score limits to the template and total number of chemical components

| Cofactor Class ID | Cofactor class name | Cofactor representative chemical component id | Number of chemical components | Match score limit |
|-------------------|---------------------|-----------------------------------------------|-------------------------------|-------------------|
|-------------------|---------------------|-----------------------------------------------|-------------------------------|-------------------|

|    |                                   |     |    |      |
|----|-----------------------------------|-----|----|------|
| 1  | Thiamine diphosphate              | TDP | 38 | 0.6  |
| 2  | Flavin adenine dinucleotide       | FAD | 15 | 0.87 |
| 3  | Flavin Mononucleotide             | FMN | 7  | 0.86 |
| 4  | Nicotinamide-adenine dinucleotide | NAD | 44 | 0.68 |
| 5  | Phosphopantetheine                | PNS | 1  | 1    |
| 6  | Coenzyme A                        | COA | 75 | 0.67 |
| 7  | Pyridoxal 5'-phosphate            | PLP | 10 | 0.8  |
| 8  | Glutathione                       | GSH | 53 | 0.42 |
| 9  | Biotin                            | BTN | 5  | 0.58 |
| 10 | Tetrahydrofollic acid             | FFO | 8  | 0.94 |
| 11 | Adenosylcobalamin                 | B12 | 4  | 0.84 |
| 12 | Ascorbic acid                     | ASC | 1  | 1    |
| 13 | Menaquinone                       | MQ7 | 1  | 1    |
| 14 | Ubiquinone                        | UQ1 | 6  | 0.53 |
| 15 | Molybdopterin                     | MGD | 9  | 0.43 |
| 16 | Biopterin                         | H4B | 8  | 0.78 |

|    |                          |     |     |      |
|----|--------------------------|-----|-----|------|
| 17 | MIO                      | MDO | 1   | 1    |
| 18 | S-adenosylmethionine     | SAM | 24  | 0.6  |
| 19 | Factor F430              | F43 | 2   | 0.94 |
| 20 | Coenzyme M               | COM | 1   | 1    |
| 21 | Coenzyme B               | TP7 | 6   | 0.75 |
| 22 | Heme                     | HEA | 25  | 0.52 |
| 24 | Dipyrromethane           | DPM | 3   | 0.97 |
| 25 | Pyrroloquinoline Quinone | PQQ | 1   | 1    |
| 26 | Topaquinone              | TPQ | 10  | 0.55 |
| 27 | Orthoquinone             | TRQ | 4   | 0.88 |
| 28 | Lipoic acid              | LPA | 2   | 1    |
|    |                          |     |     |      |
|    | Grand total              |     | 364 |      |

Table 4: Summary of the cofactor API endpoints

| Method | Endpoint                                                                                                                                  | Description                                                                                |
|--------|-------------------------------------------------------------------------------------------------------------------------------------------|--------------------------------------------------------------------------------------------|
| GET    | <a href="https://www.ebi.ac.uk/pdbe/api/pdb/compound/cofactors">https://www.ebi.ac.uk/pdbe/api/pdb/compound/cofactors</a>                 | Summary of the cofactor annotation in the PDBe                                             |
| GET    | <a href="https://www.ebi.ac.uk/pdbe/api/pdb/entry/cofactor/:pdbid">https://www.ebi.ac.uk/pdbe/api/pdb/entry/cofactor/:pdbid</a>           | Cofactors present in a PDB entry.                                                          |
| GET    | <a href="https://www.ebi.ac.uk/pdbe/api/pdb/compound/cofactors/het/:id">https://www.ebi.ac.uk/pdbe/api/pdb/compound/cofactors/het/:id</a> | List of cofactor-like molecules similar to the query and their similarity to the template. |

## Figure

Figure 1 - Distribution of cofactor-like chemical components as observed in the PDB chemical component dictionary across Enzyme classes

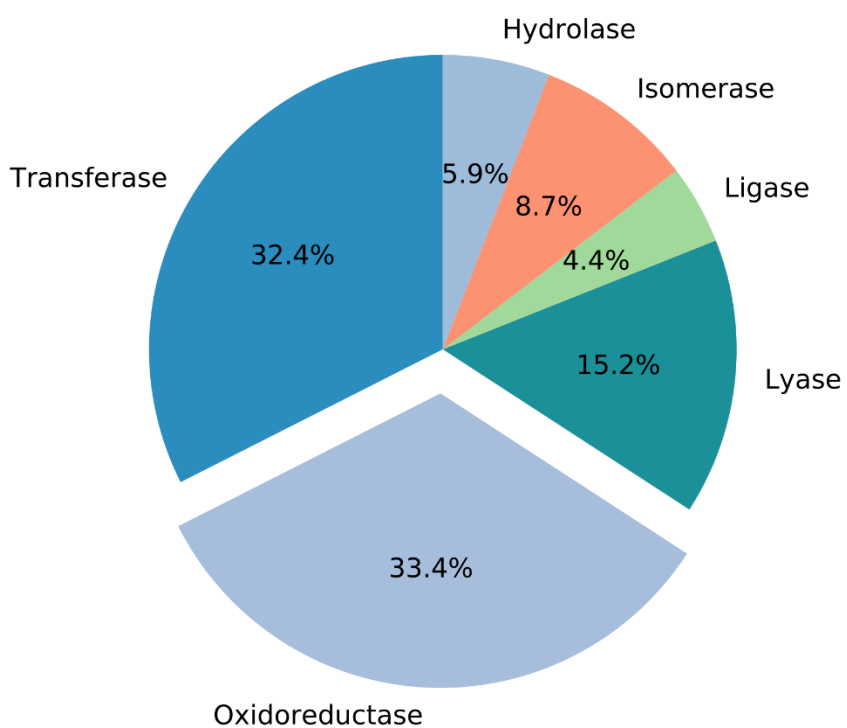

Figure 2 the PDBe entry page (pdbe.org/5hht) where the newly identified cofactor molecules are displayed under the “Ligand and Environment” section.

## PDBe > 5hht

Crystal structure of E. coli transketolase triple variant  
 Ser385Tyr/Asp469Thr/Arg520Gln

Source organism: *Escherichia coli* K-12

### Primary publication:

Structural Analysis of an Evolved Transketolase Reveals Divergent Binding Modes.

Affaticati PE, Dai SB, Payongsri P, Hailes HC, Tittmann K, Dalby PA

Sci Rep 6 35716 (2016)

PMID: 27767080

## Function and Biology

Details

### Reaction catalysed:

Sedoheptulose 7-phosphate + D-glyceraldehyde 3-phosphate = D-ribose 5-phosphate + D-xylulose 5-phosphate

### Biochemical function:

- transferase activity

### Biological process:

- cellular response to antibiotic

### Cellular component:

- protein-containing complex

### Sequence domains:

- Transketolase-like, pyrimidine-binding domain
- Transketolase C-terminal/Pyruvate-ferredoxin oxidoreductase domain II
- Transketolase, N-terminal
- Thiamin diphosphate-binding fold
- Transketolase, bacterial-like
- Transketolase family
- Transketolase, C-terminal domain

## Ligands and Environments

### Cofactor:

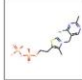

2 x TDP

### 2 bound ligands:

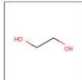

36 x EDO

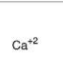

2 x CA

No modified residues

## Ligands and Environments

### Cofactor:

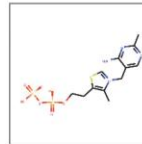

2 x TDP

### 2 bound ligands:

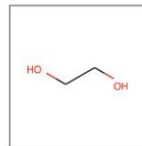

36 x EDO

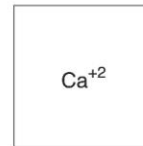

2 x CA

Figure 3 Cofactor class and the similarity to the template molecule are shown on the individual ligand page (<http://www.ebi.ac.uk/pdbe/entry/pdb/5hht/bound/TDP>).

### 5hht > TDP

#### THIAMIN DIPHOSPHATE

**Formula:**  $C_{12} H_{18} N_4 O_7 P_2 S$

**Molecular weight:** 424 Da

**Putative function:** Cofactor

Cofactor class: *Thiamine diphosphate*

Similarity to cofactor template (TDP): 1.0

#### THIAMIN DIPHOSPHATE

**Formula:**  $C_{12} H_{18} N_4 O_7 P_2 S$

**Molecular weight:** 424 Da

**Putative function:** Cofactor

Cofactor class: *Thiamine diphosphate*

Similarity to cofactor template (TDP): 1.0

#### Environment details

TDP 711 bound to chain B

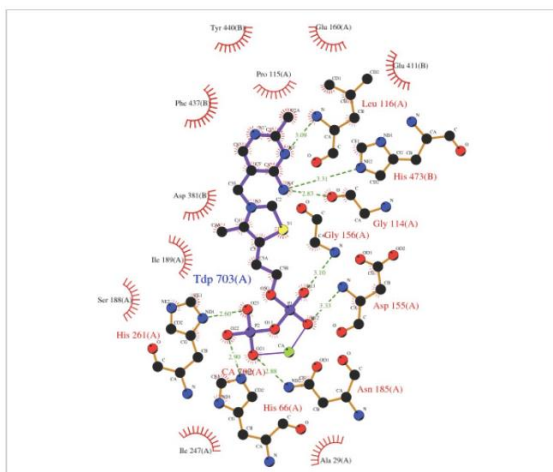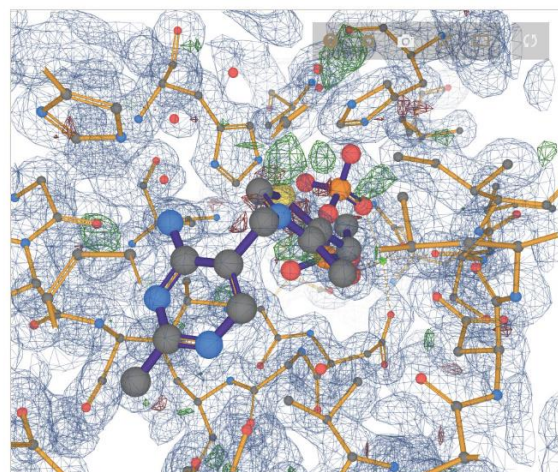

Supplement: bioinformatics_35_18_3510_s2.pdf [file bioinformatics_35_18_3510_s2.pdf]
